# Supplementary material
Source: Royal Society of Chemistry journal article supplement (doi:10.1039/d6ma00091f)
Supplement: d6ma00091f1.pdf [file d6ma00091f1.pdf]

### Supplementary Information File

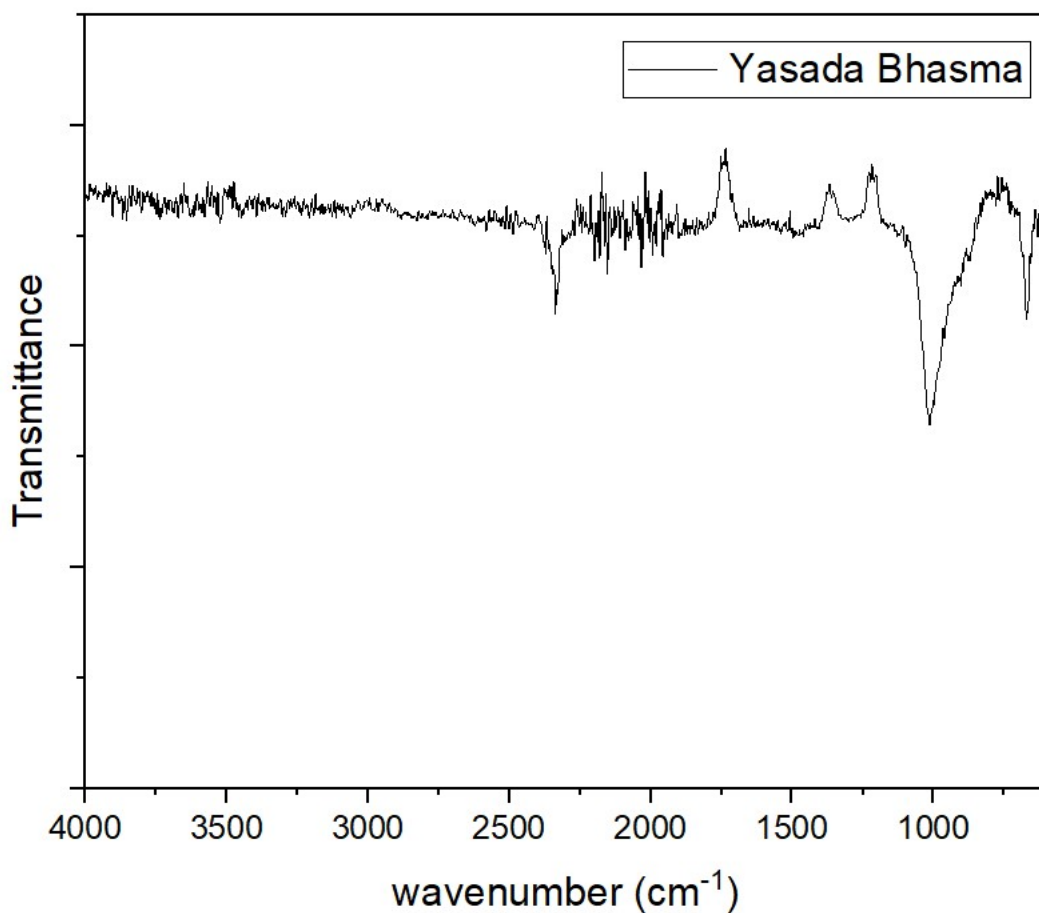

**Fig S1:** FTIR spectra of as-received Yasada Bhasma

- **Zn–O lattice vibrations:** a strong/characteristic absorption band **below ~600 cm<sup>-1</sup>** (commonly ~400–600 cm<sup>-1</sup>, often cited ~430–500 cm<sup>-1</sup>).
- **O–H / adsorbed water:** broad band ~3400 cm<sup>-1</sup> if surface hydroxyl/water present.
- **Carbonates / adsorbed CO<sub>2</sub>:** bands near ~1400–1500 cm<sup>-1</sup> and ~870 cm<sup>-1</sup> when carbonate species (e.g., ZnCO<sub>3</sub> or surface carbonates) are present.

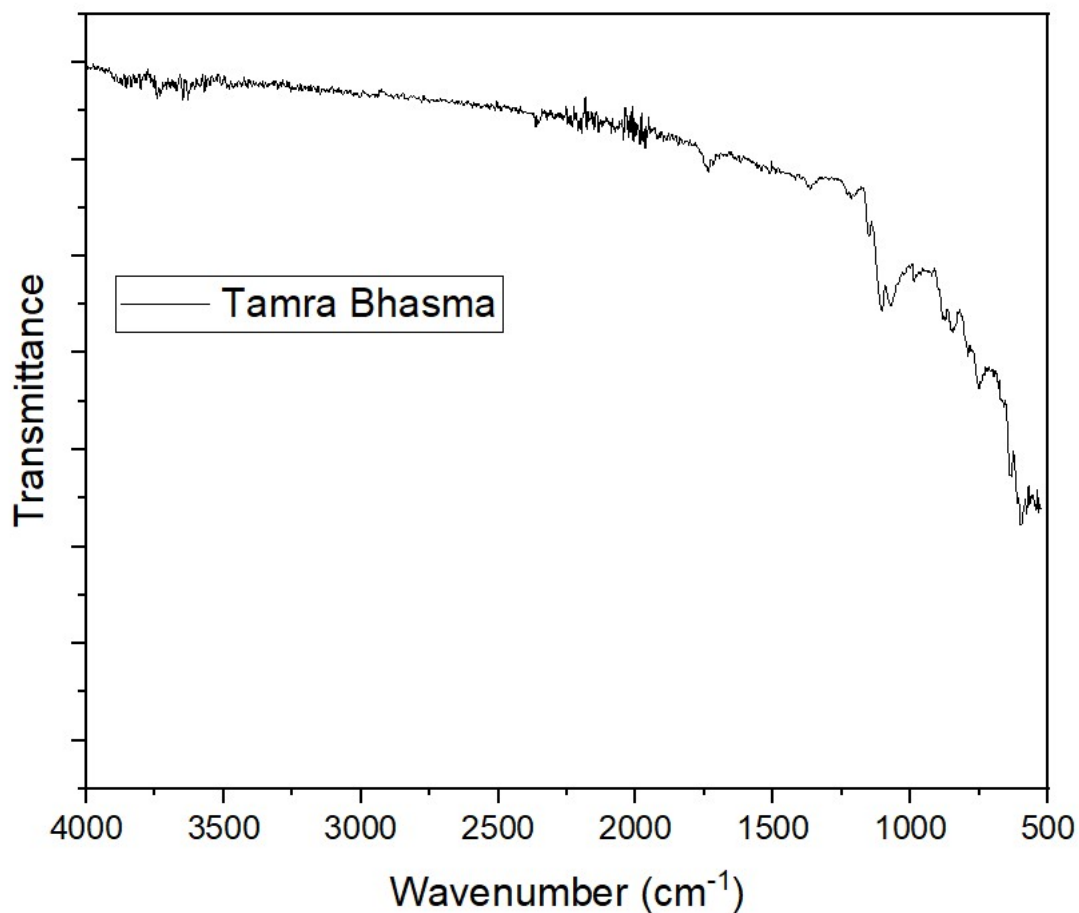

**Fig S2:** FTIR spectra of as-received Tamra Bhasma

A dramatic fall in transmittance between  $\sim 700\text{--}500\text{ cm}^{-1}$ . This matches the Cu–O lattice modes of CuO/Cu<sub>2</sub>O almost on cue. Gentle slope across  $4000\text{--}1200\text{ cm}^{-1}$ , without distinct bands suggests minimal organic residues, no significant carbonate/hydroxyl signatures, a largely inorganic, oxide-dominated composition.

### Higuchi Model Fitted Curves

### KP Model Fitted Curves

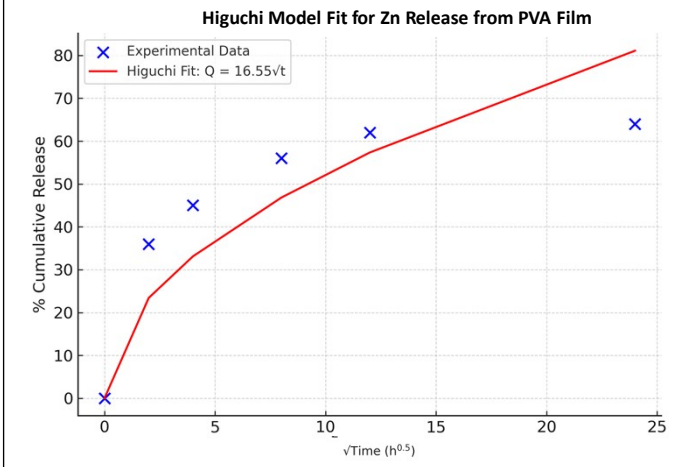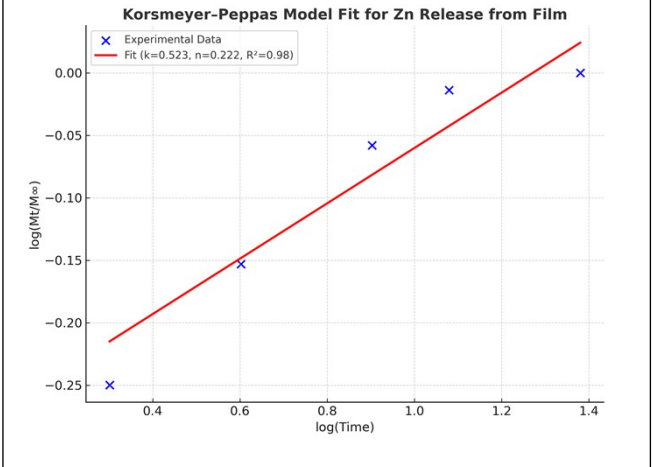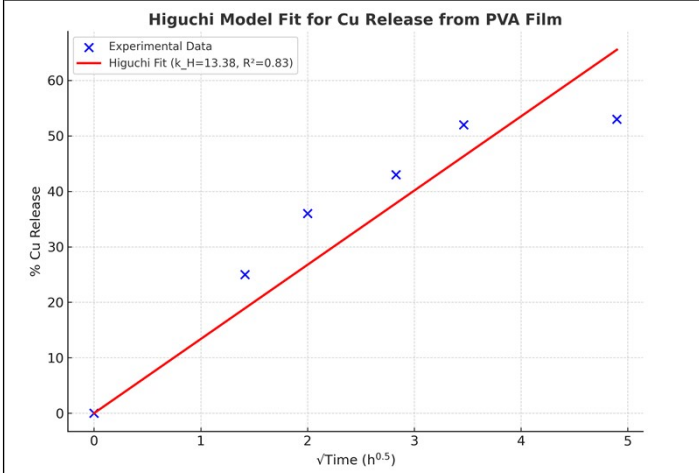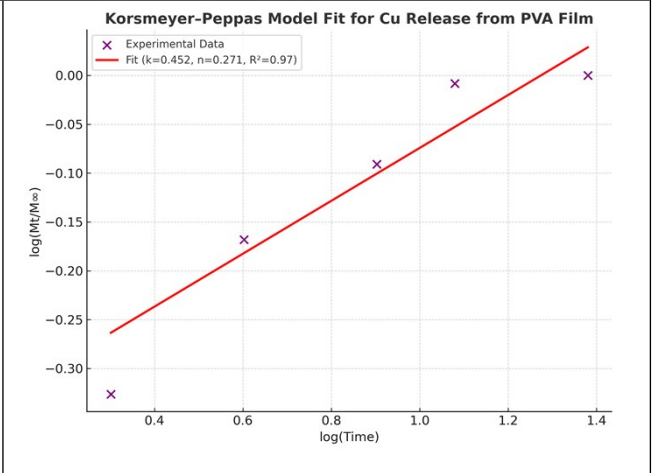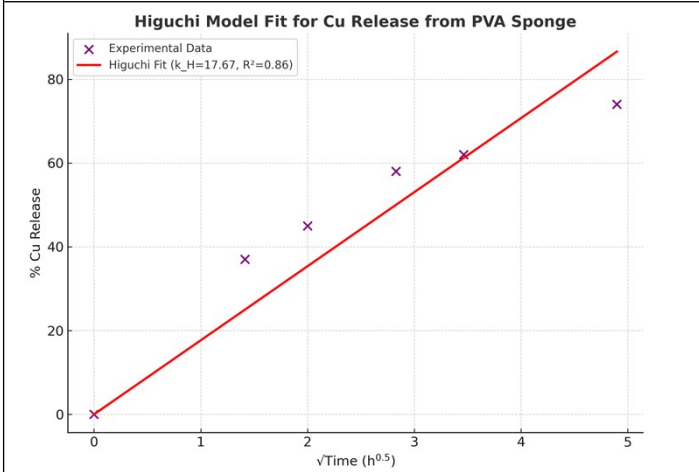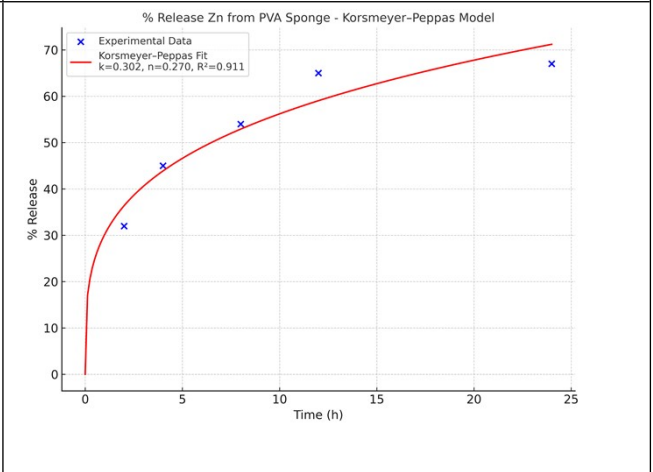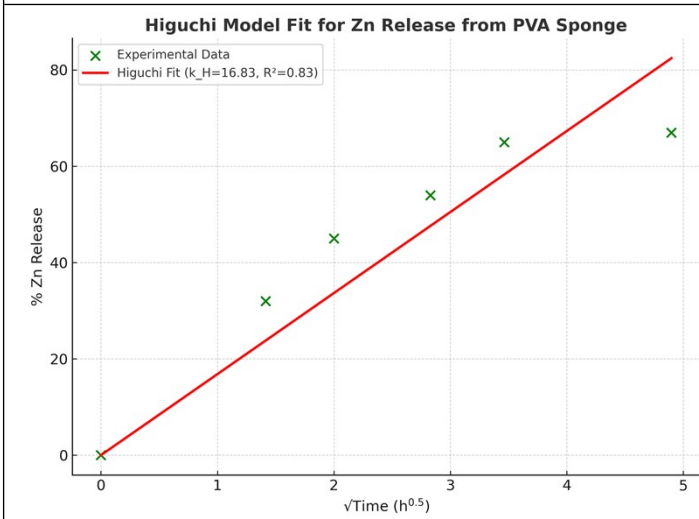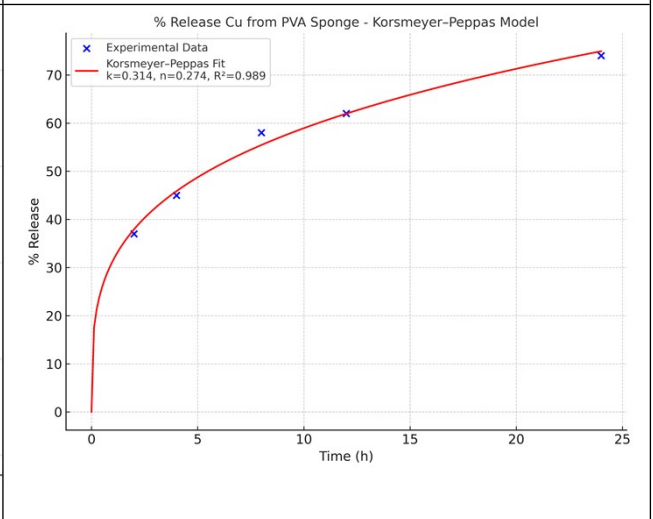

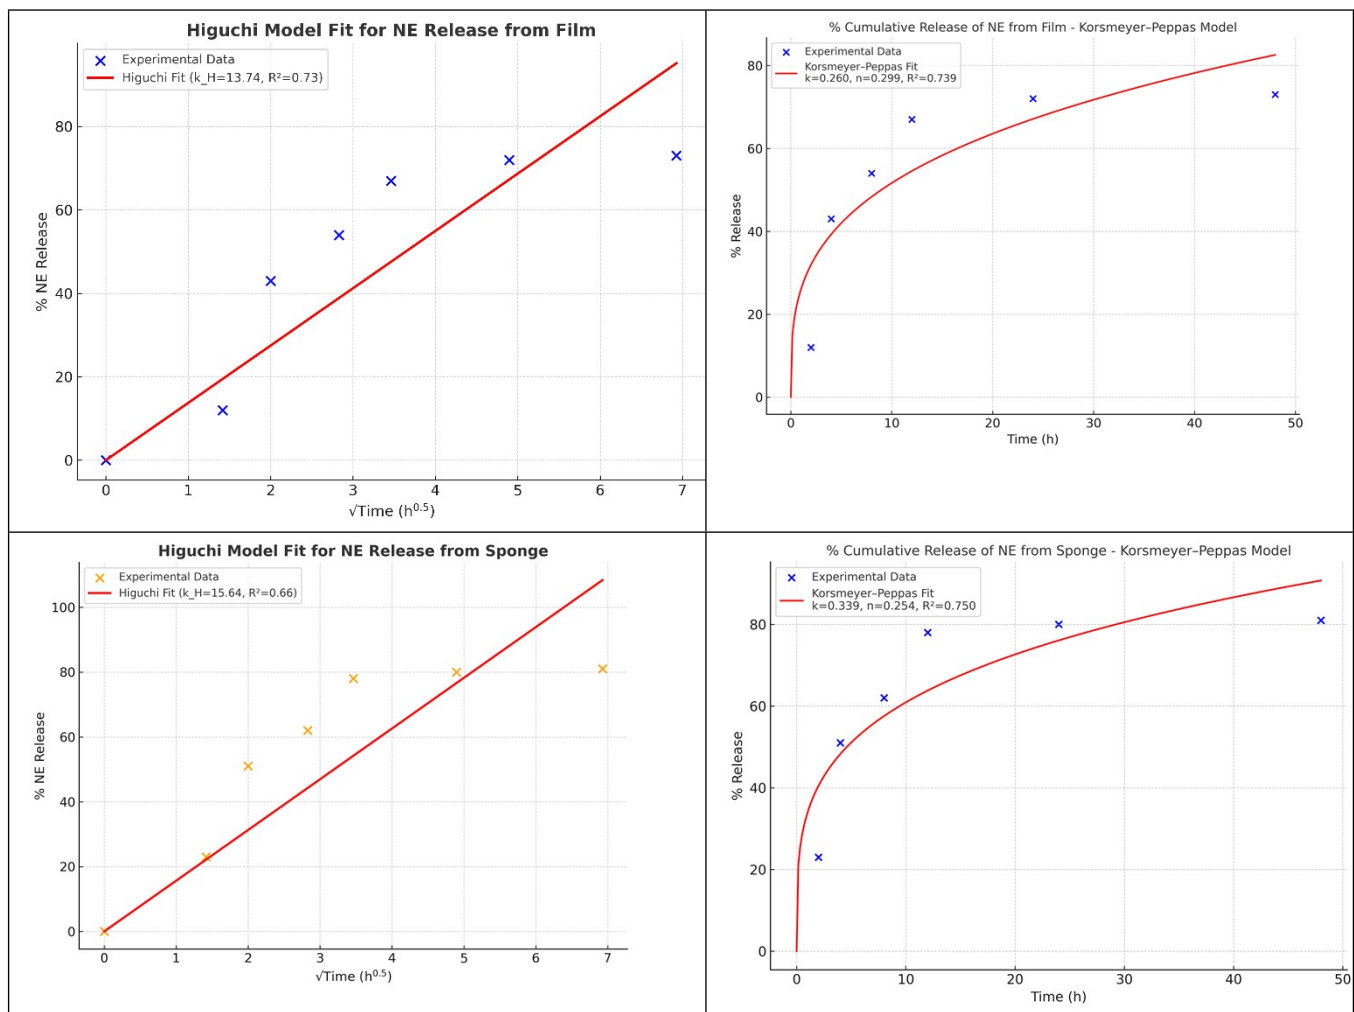

**Fig S3:** Table showing fitting of Higuchi models (Left column) and KP models (Right column) for release kinetics of Zinc, Copper and Nano-emulsion.

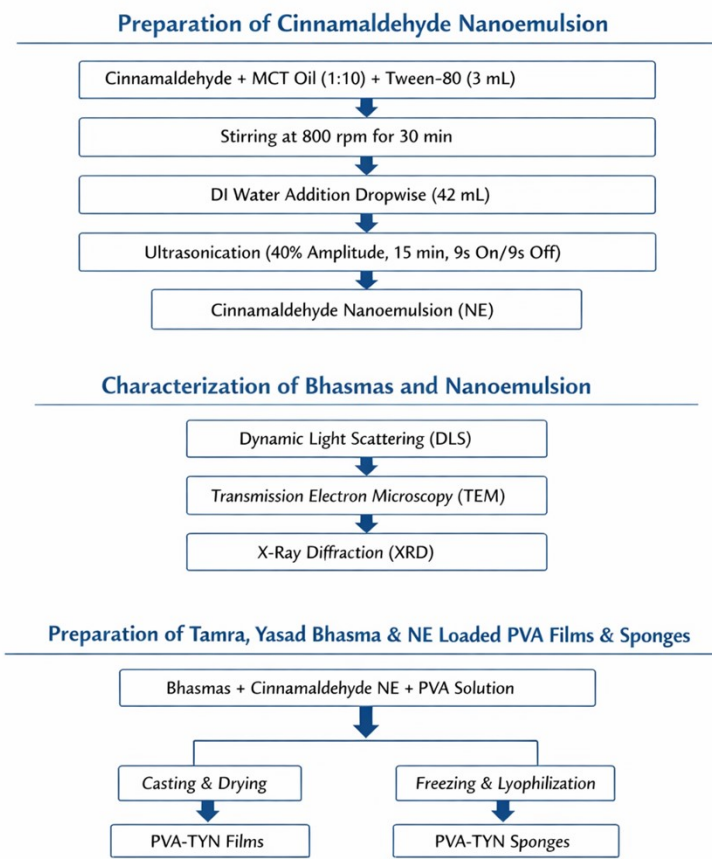

**Fig S4:** Flow chart showing preparation protocol of nano-emulsion and PVA based sponge and film
